# Supplementary material for: Fast microwave-assisted preparation of nickel–copper–chromium-layered double hydroxide as an excellent electrocatalyst for water oxidation
Source: Royal Society of Chemistry journal article supplement (doi:10.1039/d1dt01144h), 2021-01-01
Supplement: d1dt01144h1.pdf [file d1dt01144h1.pdf]

Electronic Supplementary Information

Fast microwave-assisted preparation of nickel-copper-chromium layered double hydroxide as an excellent electrocatalyst for  
water oxidation

Kamellia Nejati<sup>\*,a</sup>, Leila Jafari Foruzin<sup>\*,b</sup>, Zolfaghar Rezvani<sup>b</sup>

<sup>a</sup>Department of Chemistry, Payame Noor University, P.O. Box 19395-3697, Tehran, Iran

<sup>b</sup>Department of Chemistry, Faculty of Basic Sciences, Azarbaijan Shahid Madani University, Tabriz, Iran

\*Corresponding authors:

[l.jafarie@gmail.com](mailto:l.jafarie@gmail.com); [l.jafari@azaruniv.ac.ir](mailto:l.jafari@azaruniv.ac.ir) (Leila Jafari Foruzin) and [k\\_nejati@pnu.ac.ir](mailto:k_nejati@pnu.ac.ir) (Kamellia Nejati)

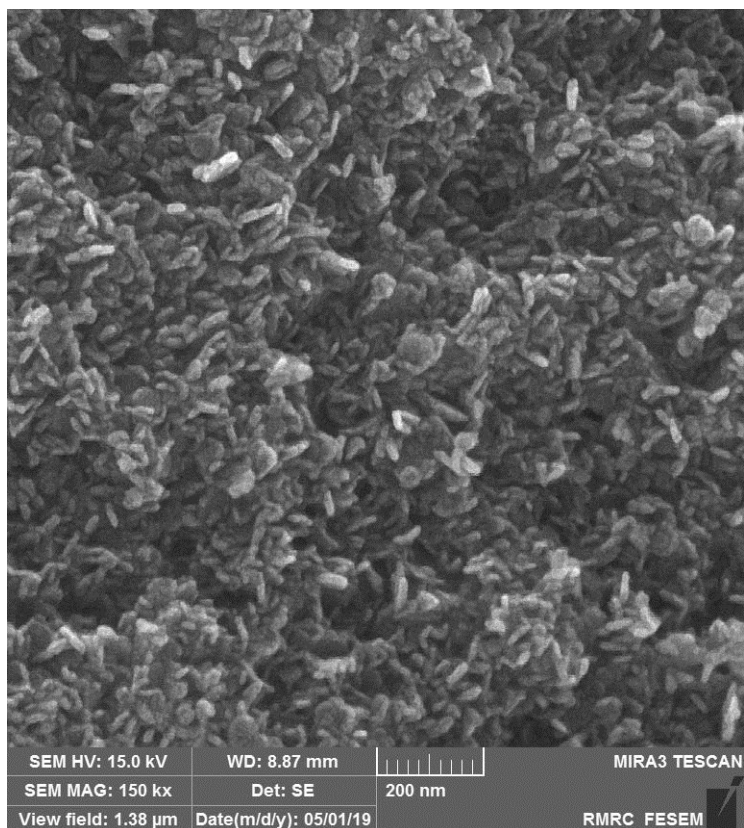

Fig. S1 FE-SEM image of  $\text{Ni}_{2.25}\text{Cu}_{0.75}\text{Cr-LDH}$

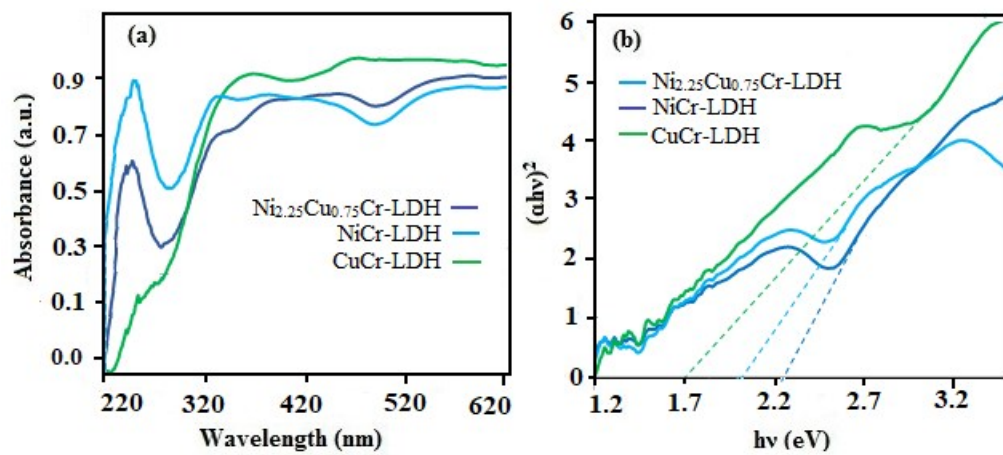

Fig. S2 (a) Diffuse reflectance spectra of the  $\text{Ni}_{2.25}\text{Cu}_{0.75}\text{Cr-LDH}$ ,  $\text{NiCr-LDH}$ , and  $\text{CuCr-LDH}$  (labelled on curves) and (b) Touc's plot transformed reflectance spectra of the  $\text{Ni}_{2.25}\text{Cu}_{0.75}\text{Cr-LDH}$ ,  $\text{NiCr-LDH}$ , and  $\text{CuCr-LDH}$

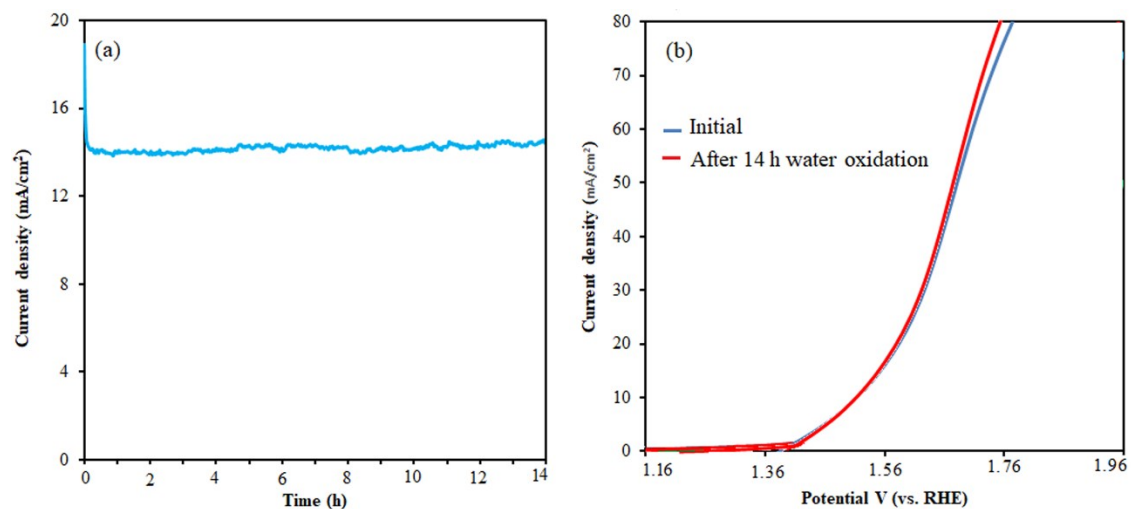

**Fig. S3** (a) Chronoamperogram curves for water oxidation using the Ni<sub>2.25</sub>Cu<sub>0.75</sub>Cr-LDH modified CPE and bare CPE (b) LSV curves of the same modified electrode in phosphate buffer solution (pH = 7.0) before and after 14 h electrolysis.

**Table S1.** The obtained data for Ni, Cu, and Cr using the Inductively Coupled Plasma

| Sample                                       | Starting metal ratios | Ni <sup>a</sup> (%) | Cu <sup>a</sup> (%) | Cr <sup>a</sup> (%) | Metal ratios in product |
|----------------------------------------------|-----------------------|---------------------|---------------------|---------------------|-------------------------|
| CuCr-LDH                                     | 3.00: 1.00            | -----               | 19                  | 5.0                 | 0.03: 0.096             |
| NiCr-LDH                                     | 3.00: 1.00            | 17.6                | -----               | 5.1                 | 0.03: 0.098             |
| Ni <sub>2.5</sub> Cu <sub>0.5</sub> Cr-LDH   | 2.50: 0.50: 1.00      | 14.6                | 3.0                 | 5.2                 | 2.47: 0.48: 1.00        |
| Ni <sub>2.25</sub> Cu <sub>0.75</sub> Cr-LDH | 2.25: 0.75: 1.00      | 13.0                | 4.8                 | 5.2                 | 2.25: 0.75: 1.00        |
| NiCuCr-LDH                                   | 2.00: 1.00: 1.00      | 11.7                | 6.3                 | 5.2                 | 2.00: 0.98: 1.00        |

<sup>a</sup> Data from the Inductively Coupled Plasma

**Table S2.** Comparison on water oxidation activity of the Ni<sub>2.25</sub>Cu<sub>0.75</sub>Cr-LDH in the present work and reported in the literature.

| Electrocatalyst                              | Electrolyte            | pH | Onset potential (V) RHE | Over potential at 10 mA/cm <sup>2</sup> | Ref.       |
|----------------------------------------------|------------------------|----|-------------------------|-----------------------------------------|------------|
| NiAlFe-LDH                                   | 0.1 M phosphate buffer | 7  | 1.57                    | 725                                     | 1          |
| NiZnFe-LDH                                   | 0.1 M phosphate buffer | 7  | 1.65                    | ---                                     | 2          |
| CoCr-LDH                                     | 0.1 M KOH              | 13 | 1.47                    | 340                                     | 3          |
| NiFeCr-LDH                                   | 1M KOH                 | 14 | 1.42                    | 280                                     | 4          |
| NiCu-LDH/SAV                                 | 1M KOH                 | 14 | 1.52                    | 290                                     | 5          |
| NiCr-LDH                                     | 1M KOH                 | 14 | 1.40                    | 320                                     | 6          |
| Cu@NiFe-LDH                                  | 1M KOH                 | 14 | 1.45                    | 199                                     | 7          |
| CC/Ni <sub>2</sub> Cu-LDH                    | 1M KOH                 | 14 | 1.50                    | 370                                     | 8          |
| Ni <sub>2</sub> Cu-LDH                       | 1M KOH                 | 14 | 1.60                    | 770                                     | 8          |
| Ni <sub>2.25</sub> Cu <sub>0.75</sub> Cr-LDH | 0.1 M phosphate buffer | 7  | 1.40                    | 280                                     | This study |

## References

- S1. L. Jafari Foruzin, B. Habibi and Z. Rezvani, *New J. Chem.*, 2018, **42**, 13963-13970.
- S2. L. J. Foruzin, Z. Rezvani, Y. H. Shishavan and B. Habibi, *Int. J. Hydrog. Energy*, 2018, **43**, 150-160.
- S3. C. Dong, X. Yuan, X. Wang, X. Liu, W. Dong, R. Wang, Y. Duan and F. Huang, *J.f Materi. Chem. A*, 2016, **4**, 11292-11298.
- S4. Y. Yang, L. Dang, M. J. Shearer, H. Sheng, W. Li, J. Chen, P. Xiao, Y. Zhang, R. J. Hamers and S. Jin, *Adv. Energy Mater.*, 2018, **8**, 1703189.
- S5. Y.-S. Xie, Z. Wang, M. Ju, X. Long and S. Yang, *Chem. sci.*, 2019, **10**, 8354-8359.
- S6. W. Ye, X. Fang, X. Chen and D. Yan, *Nanoscale*, 2018, **10**, 19484-19491.
- S7. L. Yu, H. Zhou, J. Sun, F. Qin, F. Yu, J. Bao, Y. Yu, S. Chen and Z. Ren, *Energy Environ. Sci.*, 2017, **10**, 1820-1827.
- S8. Y. Zheng, J. Qiao, J. Yuan, J. Shen, A.-j. Wang, P. Gong, X. Weng and L. Niu, *Electrochim. Acta*, 2018, **282**, 735-742.
